# Supplementary material for: Expression of human mutant cyclin dependent kinase 4, Cyclin D and telomerase extends the life span but does not immortalize fibroblasts derived from loggerhead sea turtle (Caretta caretta)
Source: PubMed Central journal article supplement (PMC6010431; doi:10.1038/s41598-018-27271-x), 2018-06-20
Supplement: 41598_2018_27271_MOESM1_ESM.pdf [file 41598_2018_27271_MOESM1_ESM.pdf]

1 **Expression of human mutant cyclin dependent kinase 4, Cyclin D and telomerase**  
2 **extends the life span but does not immortalize fibroblasts derived from loggerhead**  
3 **sea turtle (*Caretta caretta*)**

4  
5 Tomokazu Fukuda<sup>1,2,3\*</sup>, Takahiro Eitsuka<sup>4</sup>, Kenichiro Donai<sup>4</sup>, Masanori Kurita<sup>5</sup>,  
6 Tomomi Saito<sup>6</sup>, Hitoshi Okamoto<sup>5</sup>, Kodzue Kinoshita<sup>7</sup>, Masafumi Katayama<sup>3,8</sup> Hiroshi  
7 Nitto<sup>5</sup>, Takafumi Uchida<sup>4</sup>, Manabu Onuma<sup>3,8</sup>, Hideko Sone<sup>9</sup>, Miho Inoue-Murayama<sup>3,7</sup>,  
8 Tohru Kiyono<sup>10\*</sup>

9  
10 <sup>1</sup>Graduate School of Science and Engineering, Iwate University, Morioka, Japan

11 <sup>2</sup>Soft-Path Engineering Research Center (SPERC), Iwate University, Morioka, Japan

12 <sup>3</sup>Wildlife Genome Collaborative Research Group, National Institute for Environmental  
13 Studies, Tsukuba, Ibaraki, Japan

14 <sup>4</sup>Graduate School of Agricultural Science, Tohoku University, Sendai, Miyagi, Japan

15 <sup>5</sup>Port of Nagoya Public Aquarium, Nagoya, Japan

16 <sup>6</sup>Uda Marine Biological Institute, Kochi University, Tosa, Kochi, Japan

17 <sup>7</sup>Wildlife Research Center, Kyoto University, Kyoto, Japan

18 <sup>8</sup>Ecological Genetics Analysis Section, Center for Environmental Biology and  
19 Ecosystem, National Institute for Environmental Studies, Tsukuba, Ibaraki, Japan

20 <sup>9</sup>Environmental Exposure Research Section, Center for Environmental Risk Research,  
21 National Institute for Environmental Studies, Tsukuba, Ibaraki, Japan

22 <sup>10</sup>Division of Carcinogenesis and Cancer Prevention, National Cancer Center Research  
23 Institute, Tsukiji, Chuo-ku, Tokyo 104-0045, Japan

24  
25 \*Correspondence should be addressed to:

26 Tohru Kiyono MD, Ph.D. and Tomokazu Fukuda, Ph.D.

27 Tohru Kiyono, MD Ph. D.

28 Tsukiji 5-1-1, Chuo-ku, Tokyo, 104-0045 Japan

29 Email: [tkiyono@ncc.go.jp](mailto:tkiyono@ncc.go.jp)

30 Tomokazu Fukuda, Ph.D.

31 4-3-5 Ueda, Morioka, Iwate, 020-8551 Japan

32 E-mail: tomofukuda009@gmail.com

33 **Running head:** Conservation of cell cycle regulators from mammalian to reptiles

**A**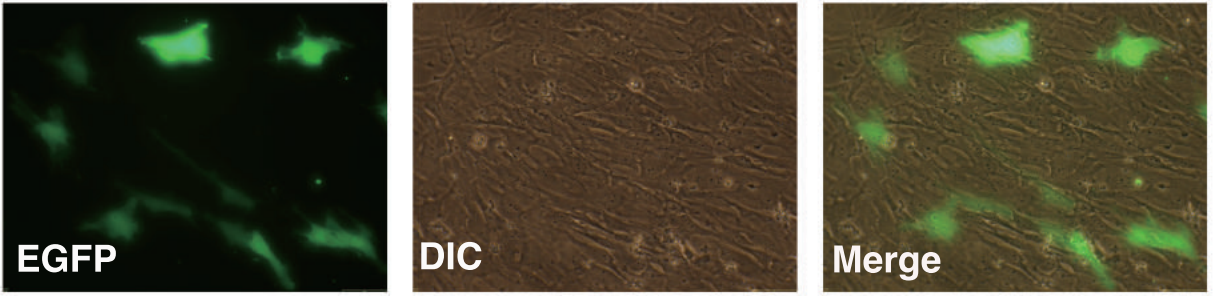**B**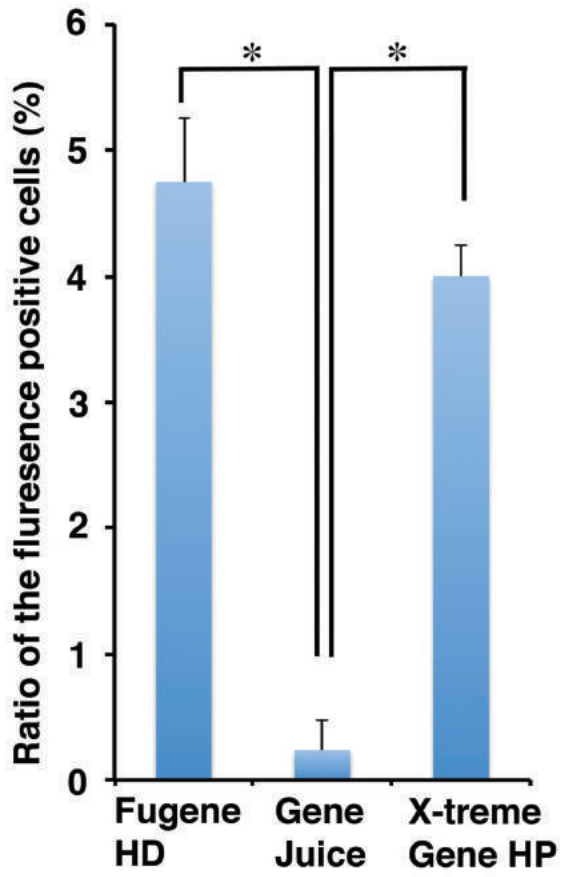

**A**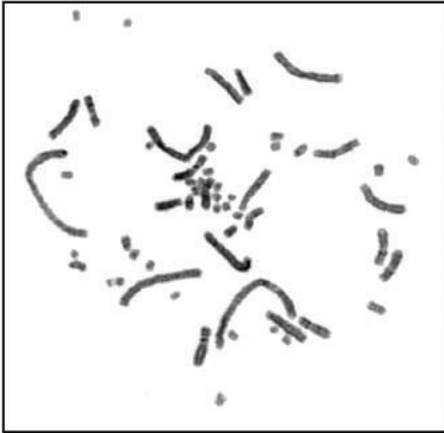**B**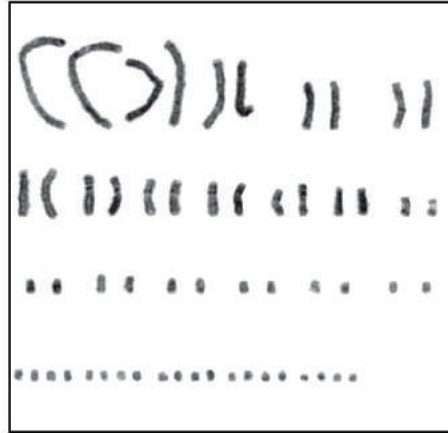**C**

| Name of Cells \ Chromosome number | 54 | 55 | 56 | 57 |
|-----------------------------------|----|----|----|----|
| 634                               | 0  | 1  | 20 | 3  |
| 640                               | 0  | 0  | 20 | 2  |
| 634-K4DT                          | 1  | 3  | 50 | 2  |
| 640-K4DT                          | 0  | 2  | 53 | 0  |

The summary of the karyotyping analysis of Loggerhead derived primary cells, or immortalized cell lines. The number of mitotic cell, which showed the specific chromosome number were shown in the table. The 22 to 56 mitotic body were analysed.

**A**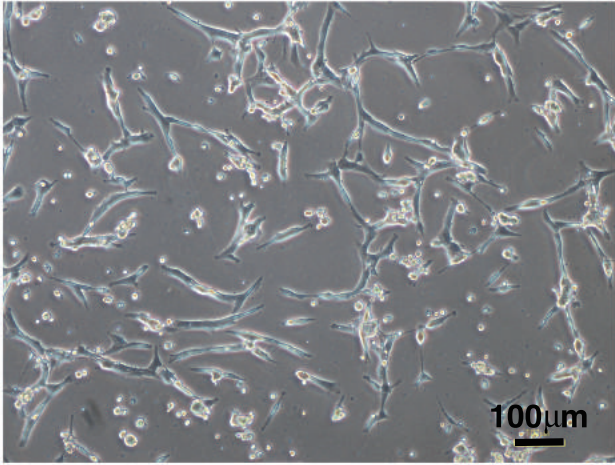**B**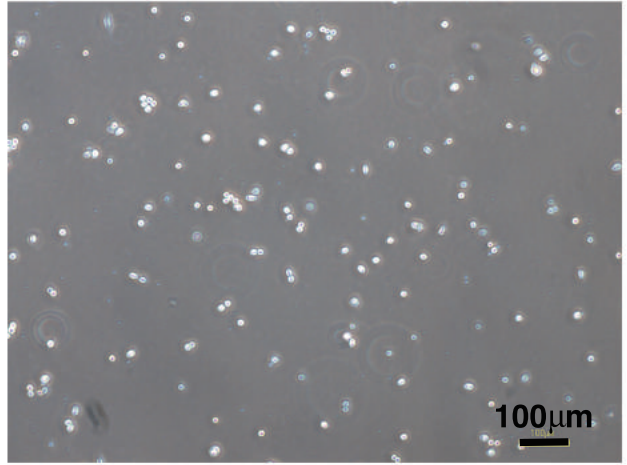

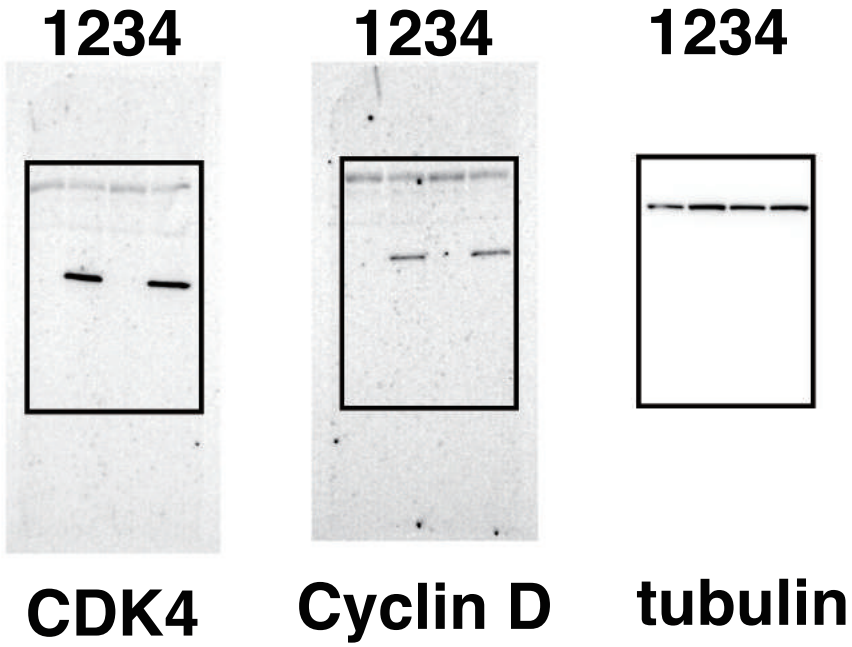

**Figure S4: Full length western blots (Figure 3)**  
Lane1, A634 primary cell, lane2, A634 derived K4DT cell, Lane3, A640 primary cell, Lane4,A640 derived K4DT cell

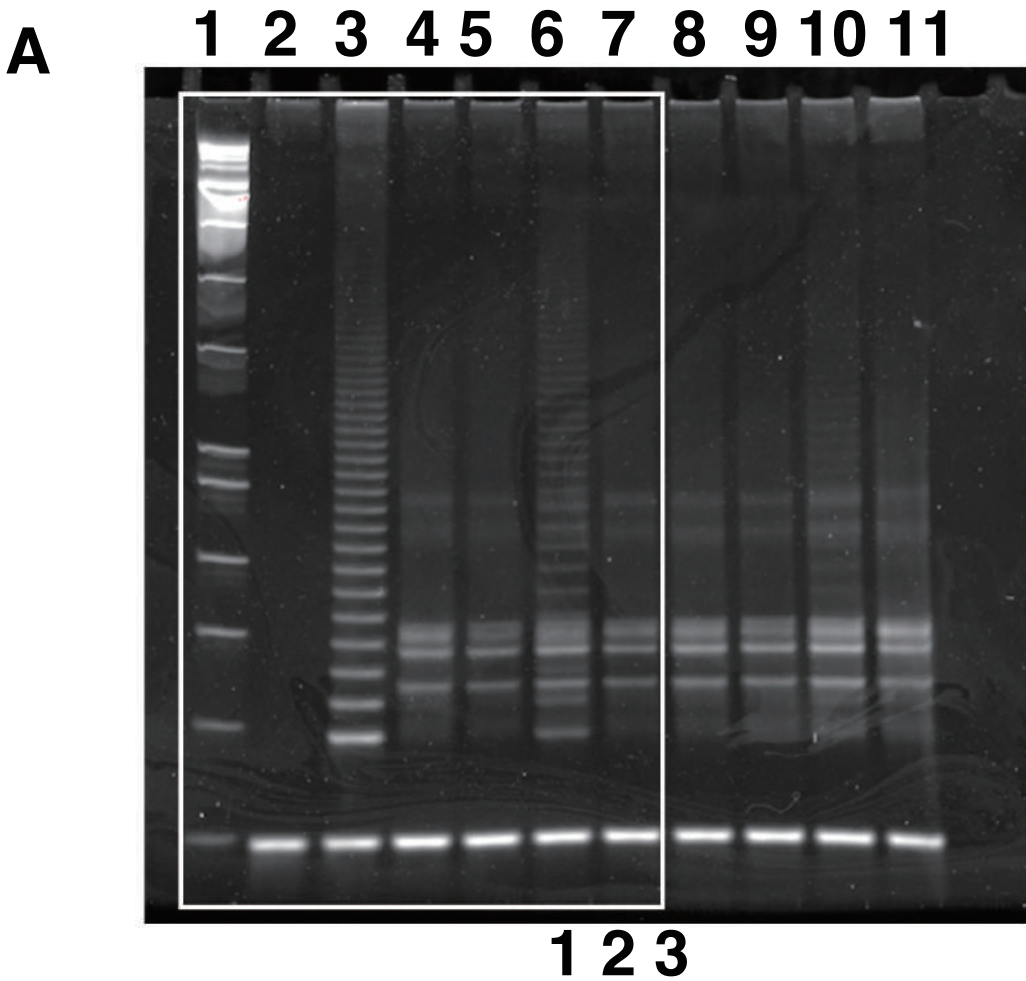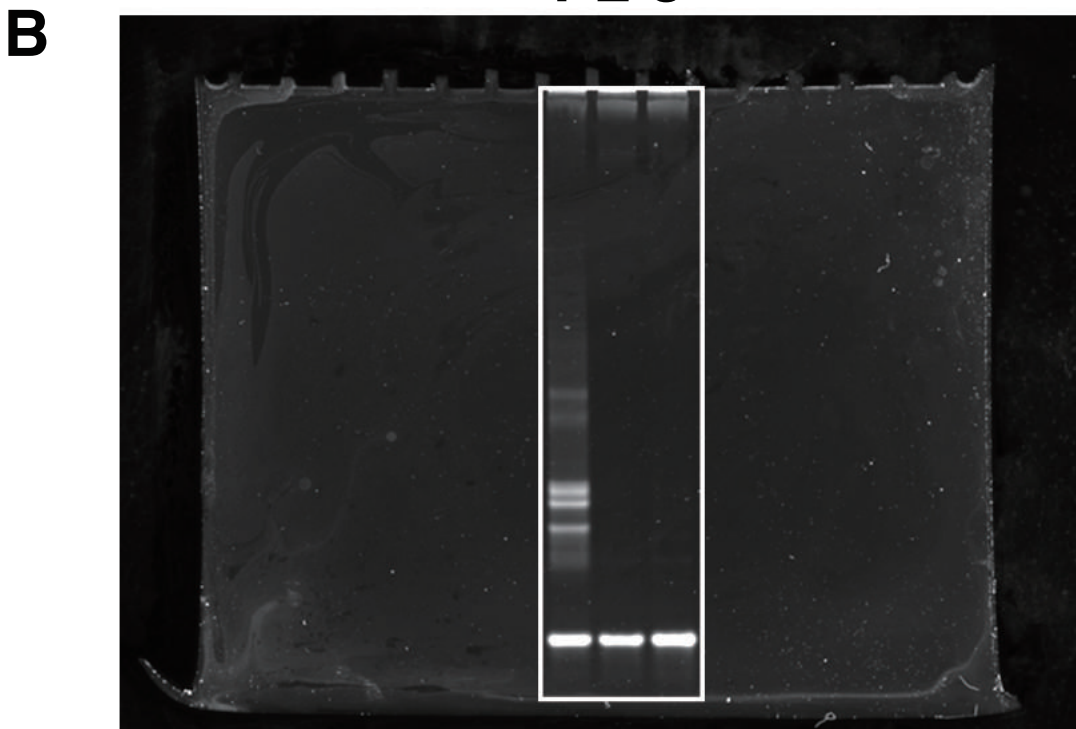

**Figure S5, Full length electrophoresis of stretch PCR. (A) Detection of telomerase activity. 1: Marker, 2: negative control, 3: Hela cell(positive control), 4: A634 primary, 5: A634K4DT, 6: A634K4DT+TERC, 7: K4D, 8: A640 primary, 9: A640K4DT, 10: A640K4DT+TERC, 11:A640K4D. (B) Detection of telomerase with primary protein lysate for treated lysate. 1: A634 primary, 2: Heat inactivated A634 primary, 3: RNase treated A634 primry protein**

## Legends for the Supplemental Figures

**Figure S1.** Fluorescence detection of EGFP expressing plasmid with the use of various transfection reagents. A, Fluorescence detection of EGFP expressing plasmid in sea turtle cells using Fugene HD. B, Ratio of fluorescence positive cells with three kinds of transfection reagents in sea turtle cells.

**Figure S2.** Karyotype analysis of A640 derived K4DT cells. A, Mitotic phase of A540 derived K4DT cells. B, Alignment of mitotic chromosomes with G-banding analysis of A640 derived K4DT cells;  $2n = 56$ . C, Chromosome number of A634 derived primary and K4DT cells, and A640 derived primary and K4DT cells. Twenty to 56 mitotic cells were analyzed.

**Figure S3.** Antibiotic selection of recombinant cells with G418. A, Cell morphology of recombinant cells expressing TERC and the gene for neomycin resistance. B, Morphology of intact K4DT cells after G418 selection. Note that most of cells

displayed a rounded morphology and were sensitive to G418 selection.

**Figure S4.** Original full scan blot of Figure 3.

**Figure S5.** Original full scan of Figure 6.
